# Supplementary material
Source: PubMed Central journal article supplement (PMC3001013)
Supplement: supp_M110.151076_jbc.M110.151076-1.pdf [file supp_M110.151076_jbc.M110.151076-1.pdf]

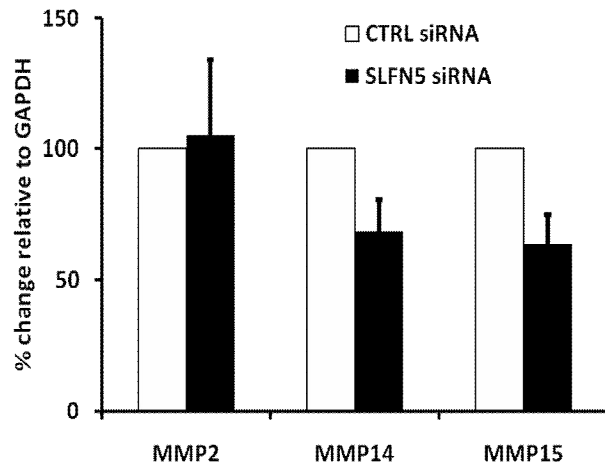

**Figure S1:** Effects of SLFN5 knockdown on the expression of MMP2, MMP14 and MMP15. Expression of MMP2, MMP14 or MMP15 mRNAs in pSIREN-SLFN5 siRNA or pSIREN-control-siRNA SKMEL28 cells was determined by real time RT-PCR using *GAPDH* as an internal control. The data are presented as percentage of expression in pSIREN ZsGreen control-siRNA cells and represent means +S.D. of 4 experiments.
